# Supplementary material
Source: ML conference proceedings conference paper supplement (https://proceedings.neurips.cc/paper_files/paper/2016/hash/ac627ab1ccbdb62ec96e702f07f6425b-Abstract.html)

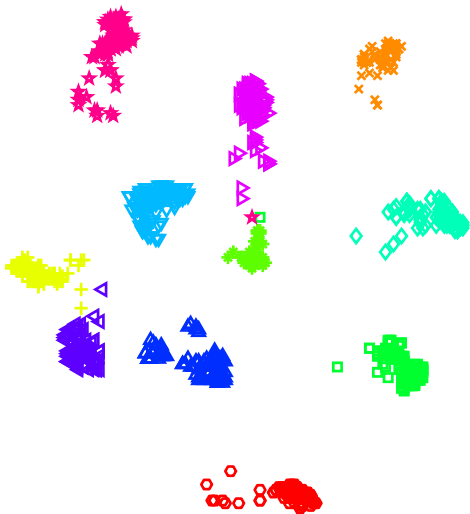

Supplement: Supplementary file [file ac627ab1ccbdb62ec96e702f07f6425b-Supplemental.zip]
